# Supplementary material for: Sarcolab pilot study into skeletal muscle’s adaptation to long-term spaceflight
Source: PubMed Central journal article supplement (PMC6141586; doi:10.1038/s41526-018-0052-1), 2018-09-17
Supplement: 41526_2018_52_MOESM1_ESM.pdf [file 41526_2018_52_MOESM1_ESM.pdf]

## Supplementary Figures

Figure S1: Regulation of vinculin isoform expression by space flight

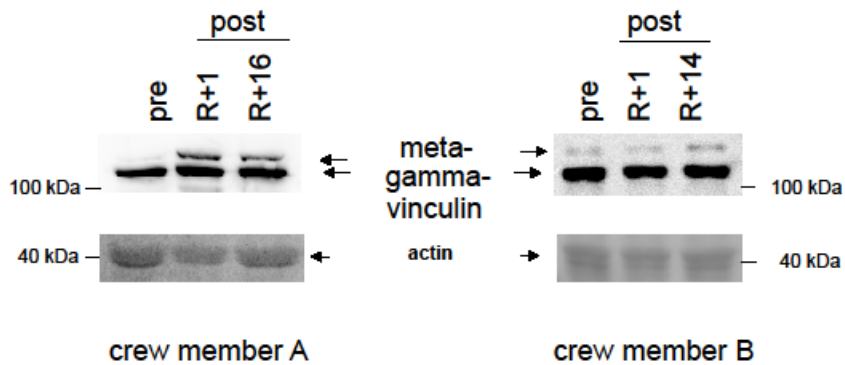

Immunoblots showing meta- and gamma-vinculin levels before and after spaceflight in both crew members. Below, loading control visualizing the staining of the skeletal alpha actin band on the membrane. kDa, kilodalton. R+1, R+14, R+16 denote 1 day, 14 and 16 days after return from space. Arrows point to the respective target protein.

### Uncropped blots from Figure S1

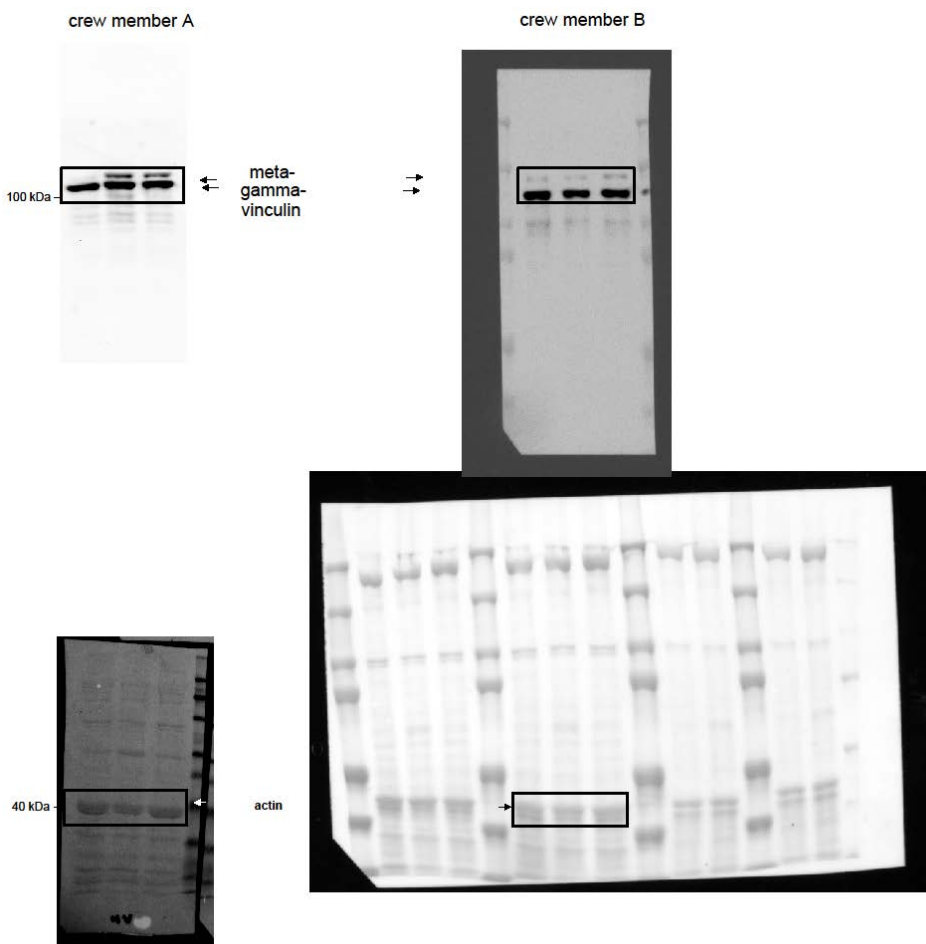

**Figure S2: Regulation of focal adhesion kinase related proteins by space flight**

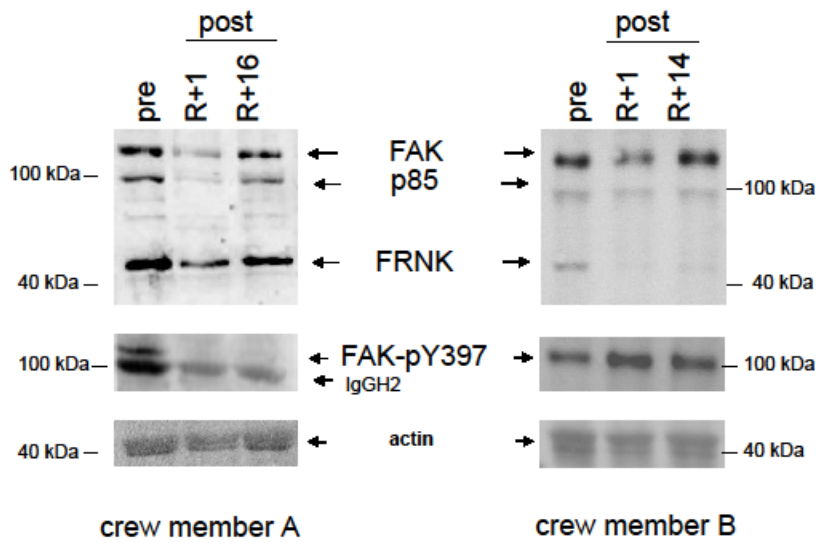

Immunoblots visualizing the expression of FAK and FRNK (top) and FAK-pY397 (middle) in the two studied crew members before and after spaceflight. Below the immunoblots, a loading control is shown, visualizing the staining of the band corresponding to skeletal alpha actin on the membrane. Abbreviations: IgGH2; heavy chain dimer of immunoglobulins. kDa, kilodalton. R+1, R+14, R+16 denote 1 day, 14 and 16 days after return from space. Arrows point to the target protein.

Uncropped blots from Figure S2

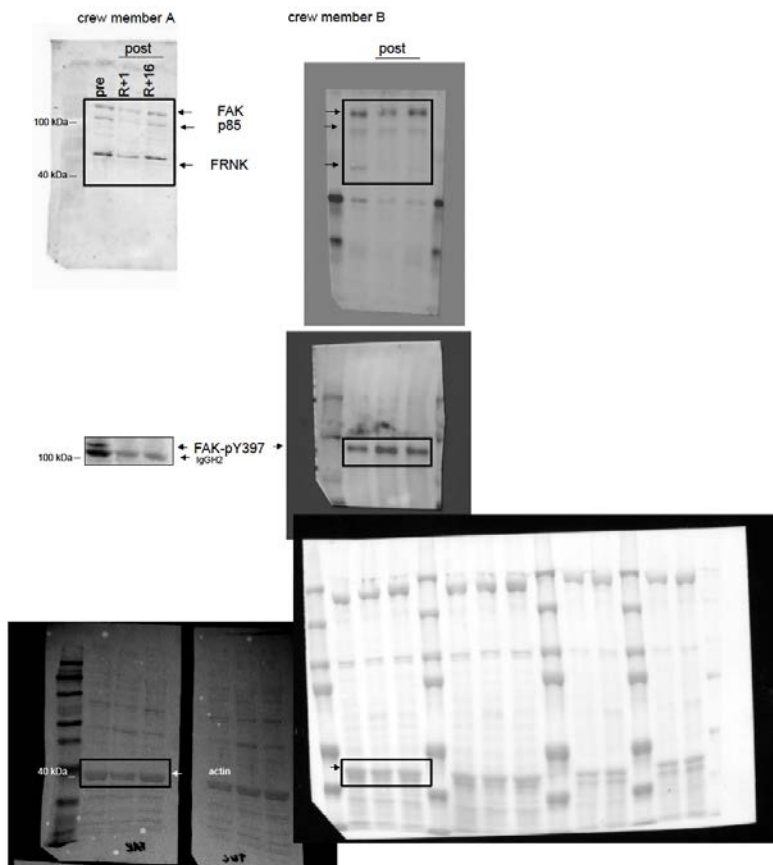

Figure S3: Regulation of tenascin-C expression by space flight

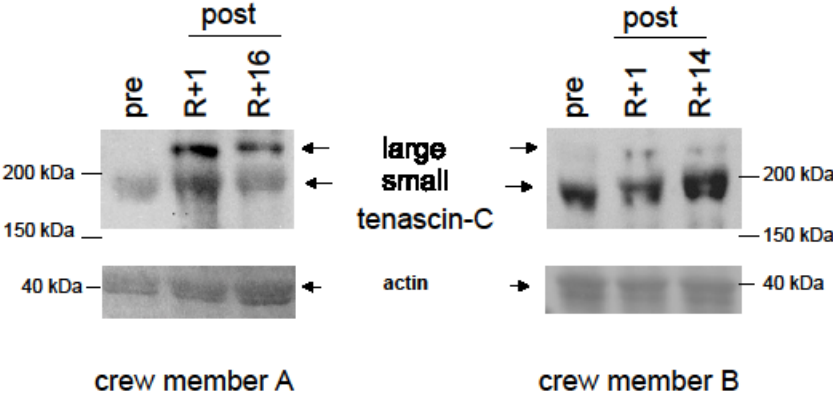

Immunoblots showing the level of the large and small tenascin-C isoform before and after spaceflight in the two crew members. Below, loading control visualizing the staining of the skeletal alpha actin band on the membrane. kDa, kilodalton. R+1, R+14, R+16 denote 1 day, 14 and 16 days after return from space. Arrows point to the respective target protein.

Uncropped blots from Figure S3

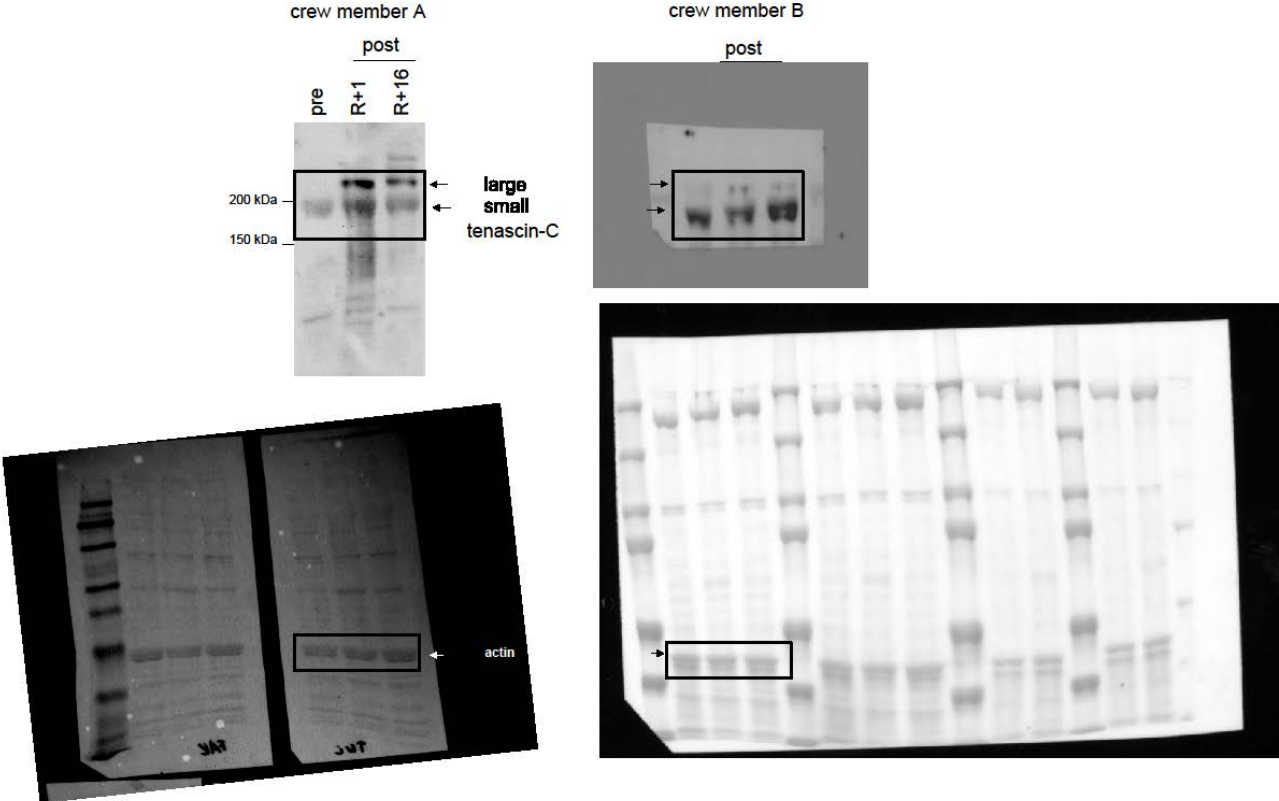

Figure S4: Principal component analysis (PCA) of muscle proteomic data

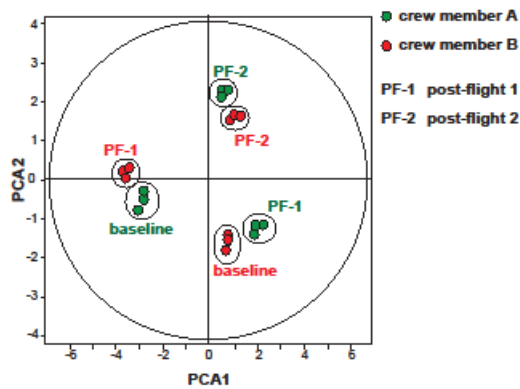

The PCA provided the overview of spots distribution in crew member A and B. In A, the protein data set of baseline was separated from PF-1 and PF-2 by PCA1 (59.2% global variation), highlighting the overall changes in protein abundance occurring immediately after flight and persisting two weeks later. PF-1 differs from PF-2 by PCA2 (25.9% global variation). Concerning B, baseline and PF-2 diverted from PF-1 through the PCA1 (61.4% global variation) suggesting their differences from PF-1. Furthermore, baseline diverted from PF-2 by PCA2 (18.5% global variation). See also Table S2.

Figure S5: Score plot of the first three components of the PCA calculated con NMR metabolomics data.

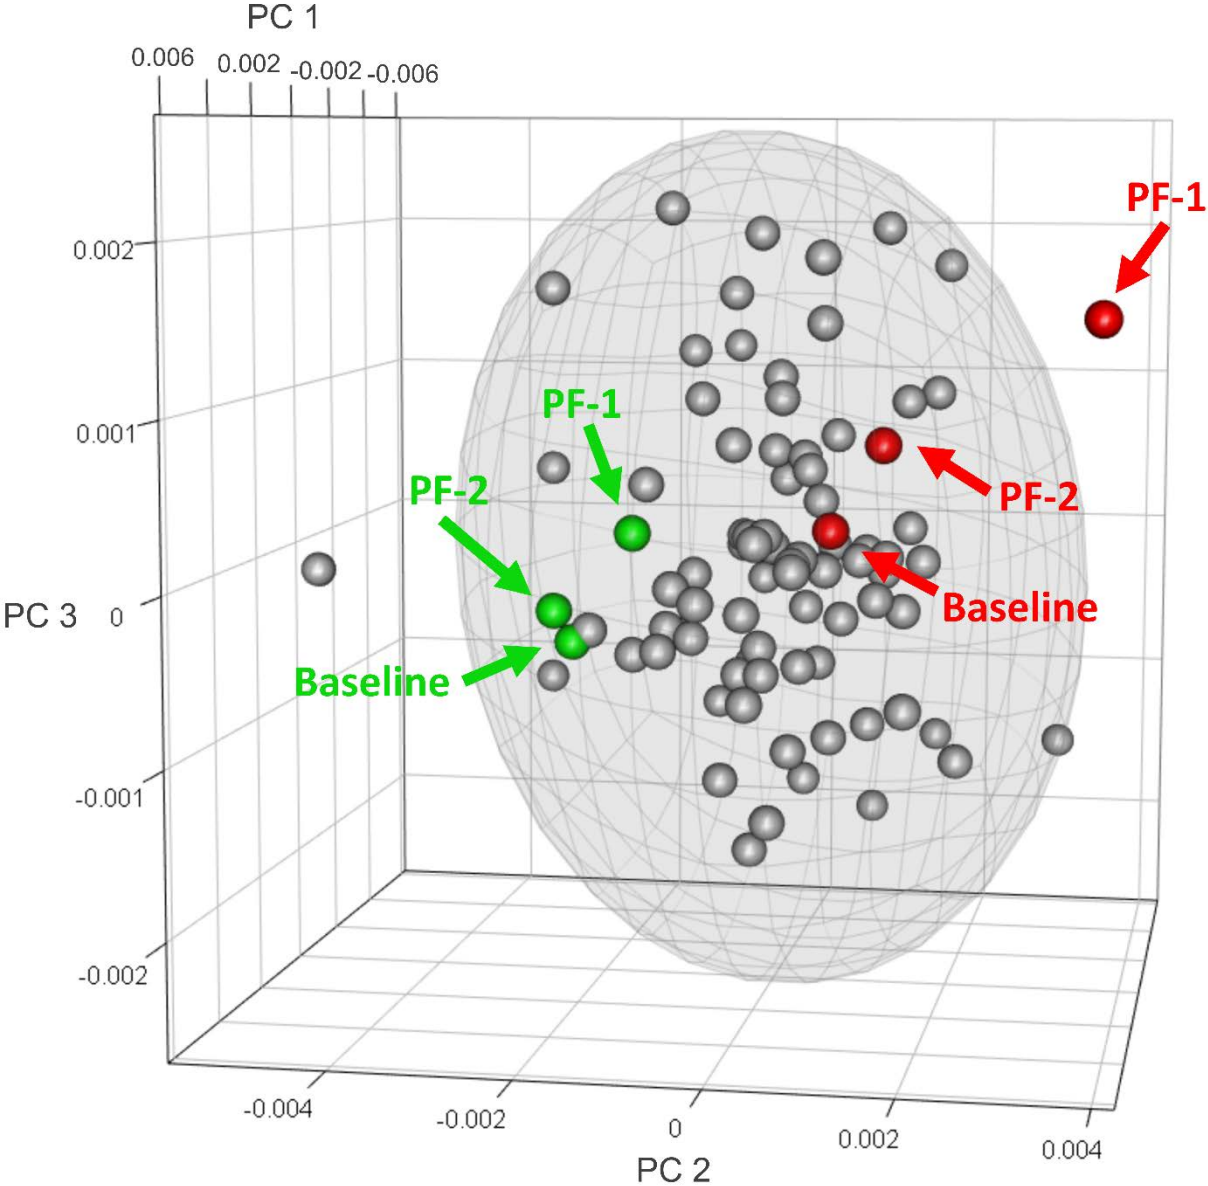

The explained variance was: PC1 55.7%, PC2 20.3%, PC3 9.6%. Each sphere represents a NMR spectrum: red crew member A, green crew member B, and grey controls. In grey the covariance ellipse.

## Supplementary Tables

*Table S1: Relationships between costameric gene products, which relate to fast fiber types*

| <b>FRNK per FAK</b>                            | <b><i>Baseline</i></b> | <b><i>PF-1</i></b> | <b><i>PF-2</i></b> |
|------------------------------------------------|------------------------|--------------------|--------------------|
| <i>Crew member A</i>                           | 2.01                   | 1.98               | 2.09               |
| <i>Crew member B</i>                           | 0.58                   | 0.34               | 0.23               |
| <b><i>meta-vinculin per gamma-vinculin</i></b> |                        |                    |                    |
| <i>Crew member A</i>                           | 0.06                   | 0.47               | 0.34               |
| <i>Crew member B</i>                           | 0.05                   | 0.05               | 0.08               |

Note the considerable increase in meta- per gamma-vinculin content in crew member A after space flight, and the relative stability of this ratio in crew member B.

Table S2: Proteomic analysis

|                        |                                                          |                             |             | Crew member A          |                                |                        |                                | Crew member B    |                                |                        |                                |
|------------------------|----------------------------------------------------------|-----------------------------|-------------|------------------------|--------------------------------|------------------------|--------------------------------|------------------|--------------------------------|------------------------|--------------------------------|
| Pathway                | Protein name                                             | Swiss-Prot accession number | Gene Symbol | Tukey PF-1 vs baseline | % fold change PF-1 vs baseline | Tukey PF-2 vs baseline | % fold change PF-2 vs baseline | Tukey PF-1 vs BL | % fold change PF-1 vs baseline | Tukey PF-2 vs baseline | % fold change PF-2 vs baseline |
| Contractile proteins   | Actin, alpha skeletal muscle                             | P68133                      | ACTA1       |                        | 0                              | 6,03E-03               | -15                            |                  | 0                              |                        | 0                              |
|                        | Actin, alpha skeletal muscle                             | P68133                      | ACTA1       |                        | 0                              | 3,93E-03               | -15                            | 8,42E-05         | 19                             | 6,72E-04               | -12                            |
|                        | Actin, alpha skeletal muscle                             | P68133                      | ACTA1       |                        | 0                              | 2,13E-03               | -12                            | 2,29E-04         | 18                             | 3,86E-03               | -10                            |
|                        | Actin, alpha skeletal muscle                             | P68133                      | ACTA1       |                        | 0                              | 5,43E-03               | -20                            |                  | 0                              | 3,39E-03               | -20                            |
|                        | Troponin I, fast skeletal muscle                         | P48788                      | TNNI2       | 7,44E-04               | 101                            |                        | 0                              |                  | 0                              | 1,98E-03               | 65                             |
|                        | Troponin T, slow skeletal muscle (TnTs)                  | P13805                      | TNNT1       | 5,42E-03               | -11                            |                        | 0                              | 1,72E-03         | 19                             | 4,10E-03               | -18                            |
|                        | Troponin T, slow skeletal muscle (TnTs)                  | P13805                      | TNNT1       | 1,60E-03               | -49                            | 9,28E-03               | -35                            | 4,36E-05         | 42                             | 7,04E-05               | -60                            |
|                        | Troponin T, slow skeletal muscle (TnTs)                  | P13805                      | TNNT1       |                        | 0                              |                        | 0                              | 8,19E-05         | 32                             |                        | 0                              |
|                        | Troponin T, fast skeletal muscle (TnTf)                  | P45378                      | TNNT3       | 1,38E-03               | 124                            | 9,35E-03               | 29                             | 3,15E-04         | -71                            |                        | 0                              |
|                        | Troponin T, fast skeletal muscle                         | P45378                      | TNNT3       | 5,21E-04               | 141                            |                        | 0                              | 8,41E-04         | -43                            |                        | 0                              |
|                        | Tropomyosin alpha-1 chain                                | P09493                      | TPM1        |                        | 0                              |                        | 0                              | 6,09E-05         | 19                             | 1,44E-04               | -17                            |
|                        | Tropomyosin beta chain                                   | P07951                      | TPM2        |                        | 0                              | 6,18E-03               | -27                            | 3,72E-04         | 22                             |                        | 0                              |
| Tropomyosin beta chain | P07951                                                   | TPM2                        |             | 0                      | 1,81E-03                       | -26                    | 1,38E-04                       | 18               | 6,52E-04                       | -14                    |                                |
| Anaerobic metabolism   | Glycogen phosphorylase, muscle form                      | P11217                      | PYGM        | 5,42E-03               | -37                            |                        | 0                              |                  | 0                              |                        | 0                              |
|                        | Glycogen phosphorylase, muscle form                      | P11217                      | PYGM        | 3,23E-03               | -27                            |                        | 0                              |                  | 0                              |                        | 0                              |
|                        | Glycogen phosphorylase, muscle form                      | P11217                      | PYGM        | 4,60E-04               | -42                            | 5,17E-03               | -47                            |                  | 0                              |                        | 0                              |
|                        | Glycogen phosphorylase, muscle form                      | P11217                      | PYGM        | 7,28E-04               | -47                            | 2,26E-03               | -48                            |                  | 0                              |                        | 0                              |
|                        | Glycerol-3-phosphate dehydrogenase [NAD(+)], cytoplasmic | P21695                      | GPD1        | 7,27E-03               | 21                             |                        | 0                              |                  | 0                              |                        | 0                              |
|                        | Fructose-bisphosphate aldolase A                         | P04075                      | ALDOA       |                        | 0                              | 7,09E-03               | -29                            |                  | 0                              |                        | 0                              |
|                        | Fructose-bisphosphate aldolase A                         | P04075                      | ALDOA       |                        | 0                              | 7,45E-03               | -16                            |                  | 0                              |                        | 0                              |
|                        | Glyceraldehyde-3-phosphate dehydrogenase                 | P04406                      | GAPDH       |                        | 0                              |                        | 0                              |                  | 0                              | 4,93E-03               | 15                             |

|                                                                      |                                                                          |        |          |          |          |          |          |          |          |          |     |
|----------------------------------------------------------------------|--------------------------------------------------------------------------|--------|----------|----------|----------|----------|----------|----------|----------|----------|-----|
|                                                                      | Glyceraldehyde-3-phosphate dehydrogenase                                 | P04406 | GAPDH    |          | 0        |          | 0        |          | 0        | 2,90E-03 | 14  |
|                                                                      | Glyceraldehyde-3-phosphate dehydrogenase                                 | P04406 | GAPDH    |          | 0        |          | 0        | 5,62E-04 | 43       | 1,93E-03 | 33  |
|                                                                      | Phosphoglycerate mutase 2                                                | P15259 | PGAM2    |          | 0        |          | 0        | 6,27E-03 | 13       |          | 0   |
|                                                                      | Alpha-enolase                                                            | P06733 | ENO1     |          | 0        | 5,72E-03 | 10       | 2,09E-05 | 22       |          | 0   |
|                                                                      | Beta-enolase                                                             | P13929 | ENO3     |          | 0        |          | 0        | 8,16E-04 | 21       |          | 0   |
|                                                                      | Beta-enolase                                                             | P13929 | ENO3     |          | 0        |          | 0        | 2,56E-03 | 17       |          | 0   |
|                                                                      | Beta-enolase                                                             | P13929 | ENO3     | 1,47E-03 | 17       | 1,32E-03 | 19       | 2,86E-03 | 13       | 6,39E-03 | 11  |
|                                                                      | Pyruvate kinase PKM                                                      | P14618 | PKM      |          | 0        |          | 0        | 2,53E-03 | 19       |          | 0   |
|                                                                      | L-lactate dehydrogenase A chain                                          | P00338 | LDHA     |          | 0        | 7,53E-03 | -29      |          | 0        |          | 0   |
| Aerobic metabolism                                                   | Aconitate hydratase, mitochondrial                                       | Q99798 | ACO2     | 4,32E-03 | -25      | 7,27E-03 | -24      |          | 0        |          | 0   |
|                                                                      | Isocitrate dehydrogenase [NADP], mitochondrial (IDH)                     | P48735 | IDH2     |          | 0        |          | 0        | 1,59E-03 | -17      | 4,57E-03 | -13 |
|                                                                      | Isocitrate dehydrogenase [NADP], mitochondrial (IDH)                     | P48735 | IDH2     |          | 0        |          | 0        | 2,66E-04 | -33      | 1,68E-03 | -19 |
|                                                                      | 2-oxoglutarate dehydrogenase, mitochondrial                              | Q02218 | OGDH     | 4,25E-03 | -26      |          | 0        |          | 0        |          | 0   |
|                                                                      | 2-oxoglutarate dehydrogenase, mitochondrial                              | Q02218 | OGDH     | 5,31E-03 | -22      |          | 0        |          | 0        |          | 0   |
|                                                                      | Dihydrolipoyl dehydrogenase, mitochondrial                               | P09622 | DLD      | 6,31E-03 | -22      | 4,40E-03 | -21      | 9,07E-03 | -40      |          | 0   |
|                                                                      | Succinyl-CoA ligase [ADP-forming] subunit beta, mitochondrial            | Q9P2R7 | SUCLA2   |          | 0        |          | 0        | 2,85E-03 | -26      |          | 0   |
|                                                                      | Succinate dehydrogenase [ubiquinone] flavoprotein subunit, mitochondrial | P31040 | SDHA     |          | 0        | 3,75E-03 | -33      | 1,21E-03 | -46      | 7,36E-03 | -26 |
|                                                                      | Malate dehydrogenase, cytoplasmic                                        | P40925 | MDH1     | 2,03E-04 | -27      | 2,28E-03 | -24      | 1,10E-03 | -18      | 1,70E-03 | -16 |
|                                                                      | Malate dehydrogenase, cytoplasmic                                        | P40925 | MDH1     | 2,91E-03 | -32      | 2,13E-03 | -39      |          | 0        |          | 0   |
|                                                                      | Aspartate aminotransferase, cytoplasmic                                  | P17174 | GOT1     | 7,43E-03 | -22      | 2,13E-03 | -34      | 5,82E-04 | -22      | 9,14E-04 | -20 |
|                                                                      | Aspartate aminotransferase, cytoplasmic                                  | P17174 | GOT1     | 3,08E-03 | -17      | 1,81E-03 | -25      | 5,24E-03 | -27      | 5,91E-03 | -26 |
|                                                                      | Aspartate aminotransferase, cytoplasmic                                  | P17174 | GOT1     |          | 0        | 4,41E-03 | -42      |          | 0        |          | 0   |
|                                                                      | Aspartate aminotransferase, mitochondrial (mAspAT)                       | P00505 | GOT2     |          | 0        |          | 0        | 6,73E-03 | -37      |          | 0   |
| NADH dehydrogenase [ubiquinone] iron-sulfur protein 3, mitochondrial | O75489                                                                   | NDUFS3 | 1,57E-03 | 41       | 3,78E-03 | 58       | 1,12E-04 | -32      | 4,96E-03 | -11      |     |



|                     |                                                                |        |        |          |     |          |     |          |     |          |     |
|---------------------|----------------------------------------------------------------|--------|--------|----------|-----|----------|-----|----------|-----|----------|-----|
|                     | NADH dehydrogenase [ubiquinone] flavoprotein 1, mitochondrial  | P49821 | NDUFV1 |          | 0   |          | 0   | 2,35E-03 | 18  |          | 0   |
|                     | Cytochrome b-c1 complex subunit 1, mitochondrial               | P31930 | UQCRC1 | 1,38E-03 | -19 | 8,23E-04 | -28 | 6,13E-04 | -32 |          | 0   |
|                     | ATP synthase subunit alpha, mitochondrial                      | P25705 | ATP5A1 | 1,16E-03 | -21 | 7,13E-04 | -19 |          | 0   |          | 0   |
|                     | ATP synthase subunit beta, mitochondrial                       | P06576 | ATP5B  | 1,21E-03 | -31 | 3,80E-03 | -31 |          | 0   |          | 0   |
|                     | ATP synthase subunit beta, mitochondrial                       | P06576 | ATP5B  | 1,58E-03 | -26 | 3,82E-03 | -24 | 3,57E-04 | -25 | 3,32E-03 | -13 |
|                     | ATP synthase subunit d, mitochondrial                          | O75947 | ATP5H  | 5,99E-03 | -12 | 3,23E-04 | -20 | 1,53E-03 | -43 |          | 0   |
|                     | Electron transfer flavoprotein subunit beta                    | P38117 | ETFB   |          | 0   |          | 0   | 3,22E-03 | -39 |          | 0   |
|                     | Very long-chain specific acyl-CoA dehydrogenase, mitochondrial | P49748 | ACADVL | 7,03E-03 | -24 |          | 0   | 3,40E-03 | -46 |          | 0   |
|                     | Short-chain specific acyl-CoA dehydrogenase, mitochondrial     | P16219 | ACADS  | 3,60E-03 | -32 | 5,14E-03 | -30 | 1,21E-04 | -81 | 6,63E-03 | -23 |
|                     | Enoyl-CoA delta isomerase 1, mitochondrial                     | P42126 | ECI1   |          | 0   | 8,02E-03 | -15 |          | 0   |          | 0   |
|                     | Delta(3,5)-Delta(2,4)-dienoyl-CoA isomerase, mitochondrial     | Q13011 | ECH1   |          | 0   |          | 0   | 4,91E-05 | -72 |          | 0   |
| energy transduction | Creatine kinase M-type                                         | P06732 | CKM    | 3,13E-03 | -19 | 6,54E-03 | -28 |          | 0   |          | 0   |
|                     | Creatine kinase M-type                                         | P06732 | CKM    | 4,60E-04 | -21 | 3,78E-03 | -28 | 2,24E-03 | -10 | 6,12E-04 | -14 |
|                     | Creatine kinase M-type                                         | P06732 | CKM    | 2,54E-03 | -26 | 5,83E-03 | -26 | 1,33E-04 | -11 | 3,67E-05 | -16 |
|                     | Creatine kinase M-type                                         | P06732 | CKM    | 4,64E-03 | -23 | 7,09E-03 | -28 | 2,45E-03 | -12 | 9,17E-04 | -16 |
|                     | Creatine kinase S-type, mitochondrial                          | P17540 | CKMT2  | 4,64E-03 | -29 | 4,56E-03 | -32 | 3,60E-03 | -28 |          | 0   |
|                     | Adenylate kinase isoenzyme 1                                   | P00568 | AK1    |          | 0   | 3,15E-03 | 38  |          | 0   |          | 0   |

The table lists those spots that changed from Baseline to PF-1 and PF-2.

**Table S3: Testing schedule**

| Crew Member | Test                       | Baseline | Post-Flight 1 (PF-1) | Post-Flight 2 (PF-2) |
|-------------|----------------------------|----------|----------------------|----------------------|
| A           | Blood Sample & Biopsy      | L-79     | R+0                  | R+15                 |
|             | Magnetic Resonance Imaging | L-79     | R+3                  | R+15                 |
|             | Plantar flexor testing     | L-79     | R+1                  | R+15                 |
| B           | Blood Sample & Biopsy      | L-76     | R+0                  | R+15                 |
|             | Magnetic Resonance Imaging | L-76     | R+3                  | R+15                 |
|             | Plantar flexor testing     | L-76     | R+4                  | R+15                 |

Baseline dates are relative to launch (L), and post-flight dates are relative to return to Earth (R+0 = landing day).

**Table S4: Forward and reverse primers used for RT-PCR**

| Gene             | Forward primer               | Reverse primer                |
|------------------|------------------------------|-------------------------------|
| MuRF-1           | 5'-CCTGAGAGCCATTGACTTTGG-3'  | 5'-CTTCCCTTCTGTGGACTCTTCCT-3' |
| Atrogin-1        | 5'-GCAGCTGAACAACATTGATCAC-3' | 5'-CAGCCTCTGCATGATGTTTCAGT-3' |
| p62              | 5'-GCTTCCAGGCGCACTACC-3'     | 5'-CATCCTCACGTAGGACATGG-3'    |
| Beclin-1         | 5'-TGGAAGGGTCTAAGACGT-3'     | 5'-GGCTGTGGTAAGTAATGGA-3'     |
| PGC1alpha        | 5'-CAGGATTCATCTGAGTGTGGA-3'  | 5'-GCGAGAGAGAAAGGAAAAGAACA-3' |
| SREBP-1          | 5'-CGTCCCTCCTGTTGTGAAAT      | 5'-AGTGTTTTTACGGGACCAAG-3'    |
| NRF2             | 5'-CACAGAAGACCCCAACAGT-3'    | 5'-CTGTGCTTTCAGGGTGGTTT-3'    |
| β2-microglobulin | 5'-GCTGTGCTCGCGCTACTCTCT-3'  | 5'-TCTGCTGGATGACGTGAGTAAAC-3' |
